# Supplementary material
Source: PubMed Central journal article supplement (PMC3680734)
Supplement: emboj2013109df1de.pdf [file emboj2013109df1de.pdf]

# Source data Figure 1

Boxed area indicates the cropped images shown in the figure

## Figure 1D

mFK2 blot

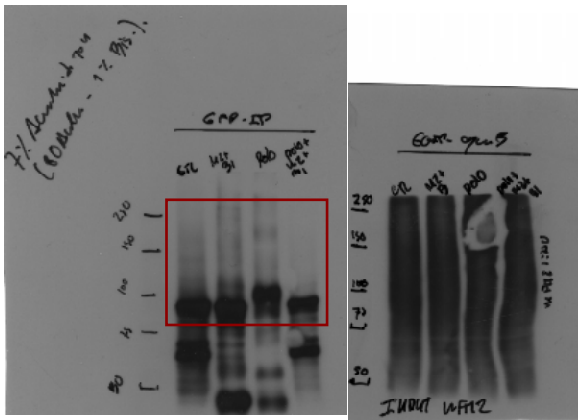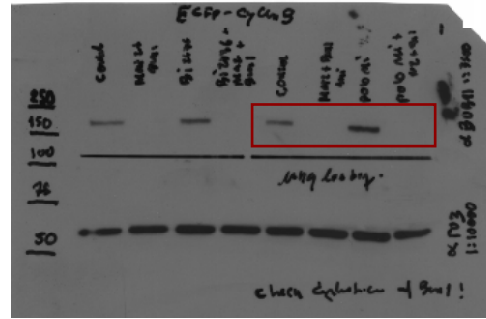

anti-BubR1

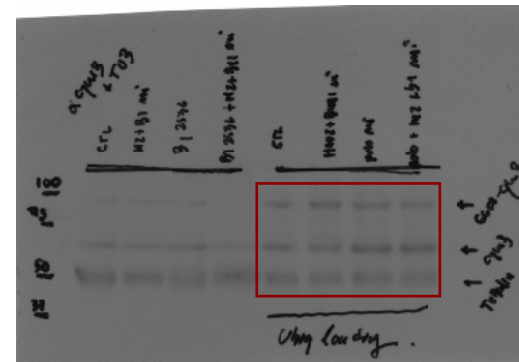

anti-CyclinB

anti-Tubulin

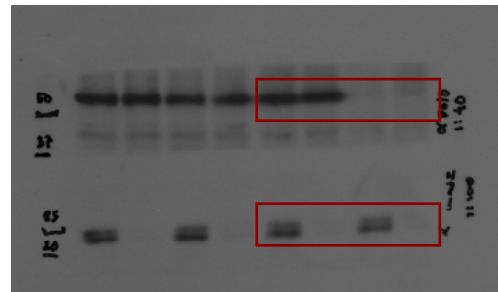

anti-Polo

anti-Mad2

## Figure 1E

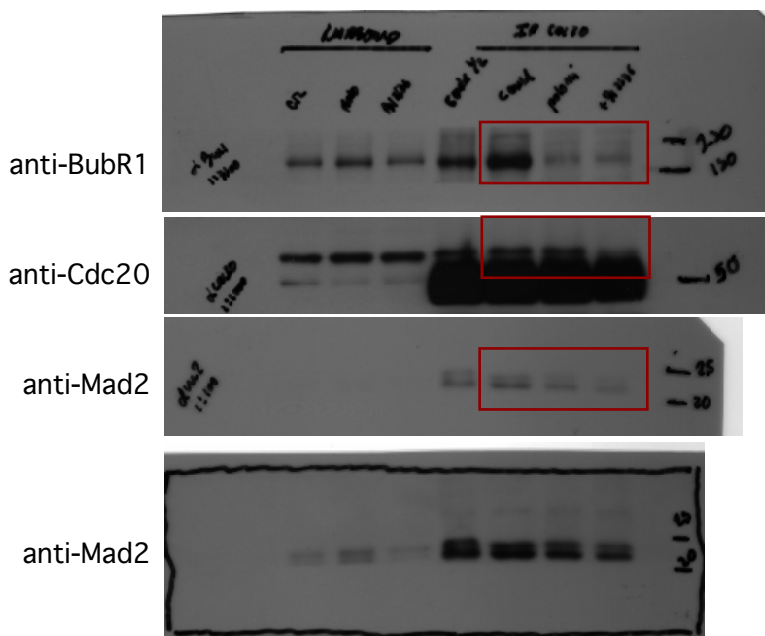

anti-BubR1

anti-Cdc20

anti-Mad2

anti-Mad2

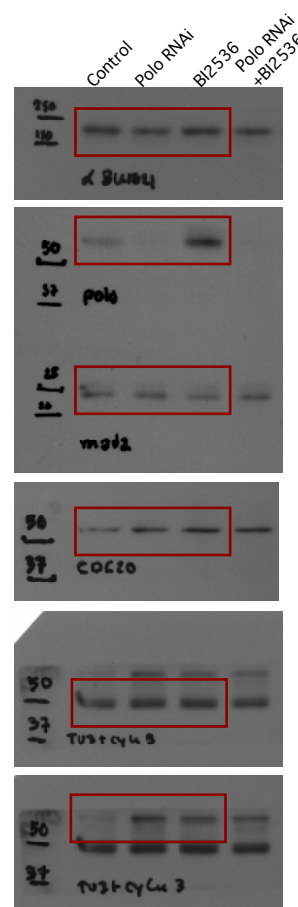

anti-BubR1

anti-Polo

anti-Mad2

anti-Cdc20

anti-CyclinB

anti-Tubulin

anti-CyclinB

anti-Tubulin
