# Supplementary material
Source: PubMed Central journal article supplement (PMC3680734)

# Source data Figure 6

Boxed area indicates the cropped images shown in the figure

## Figure 6C

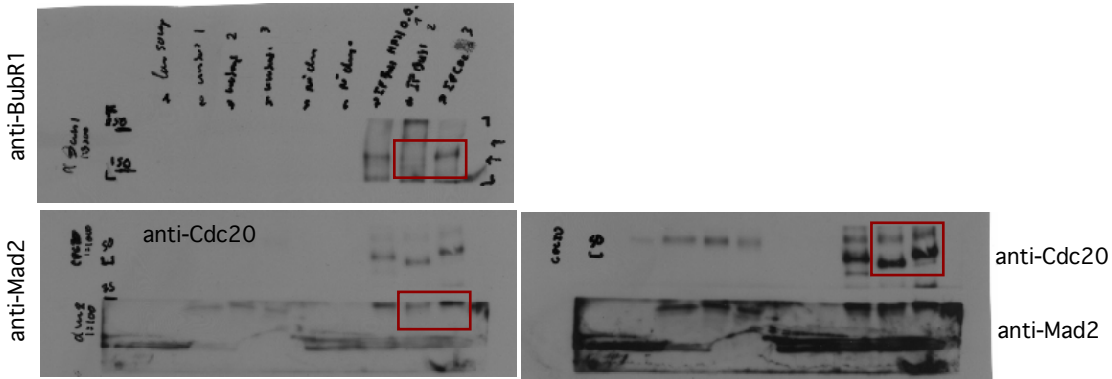

## Figure 6D

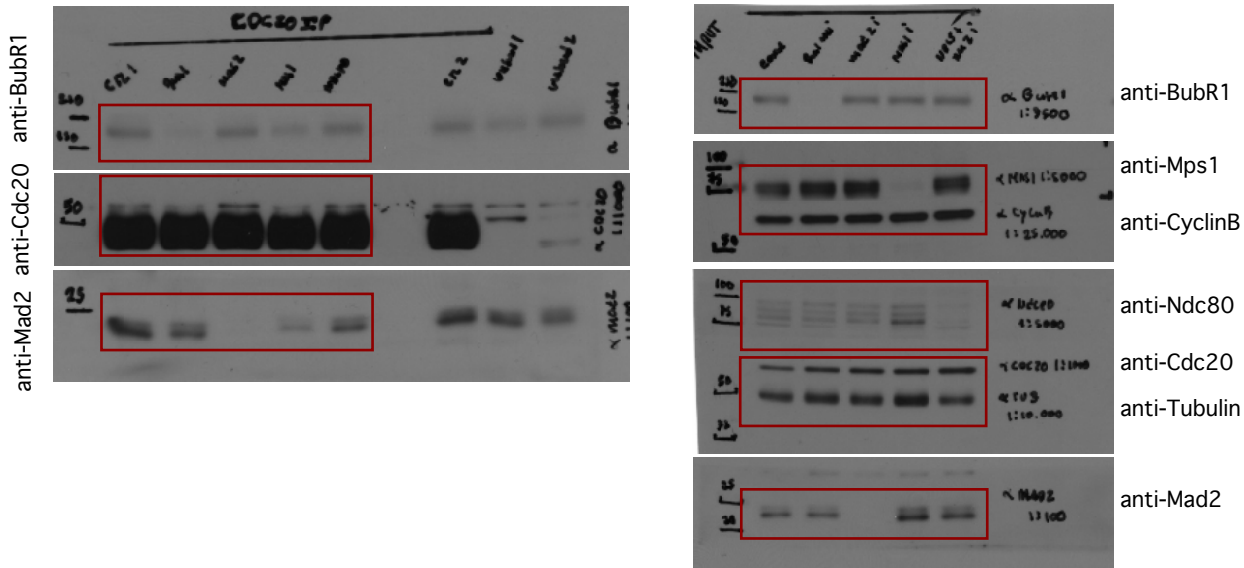

## Figure 6E

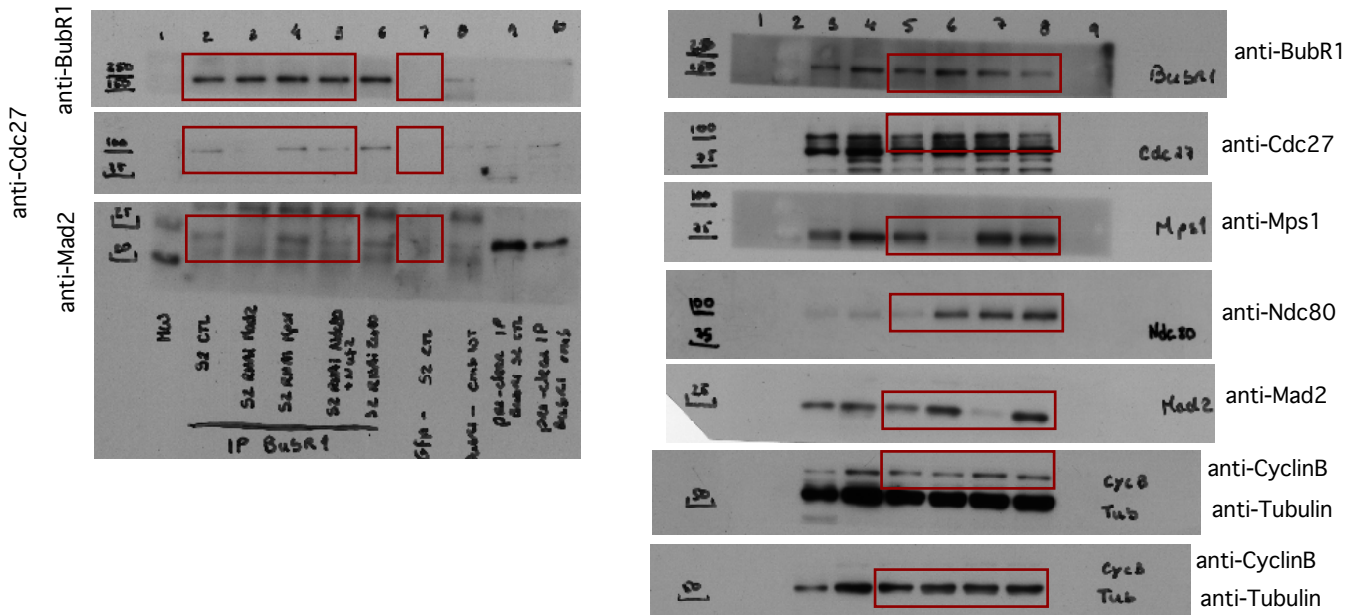

Supplement: emboj2013109df6cde.pdf [file emboj2013109df6cde.pdf]
