# Supplementary material
Source: PubMed Central journal article supplement (PMC3680734)

# Source data Figure 2

Boxed area indicates the cropped images shown in the figure

## Figure 2E

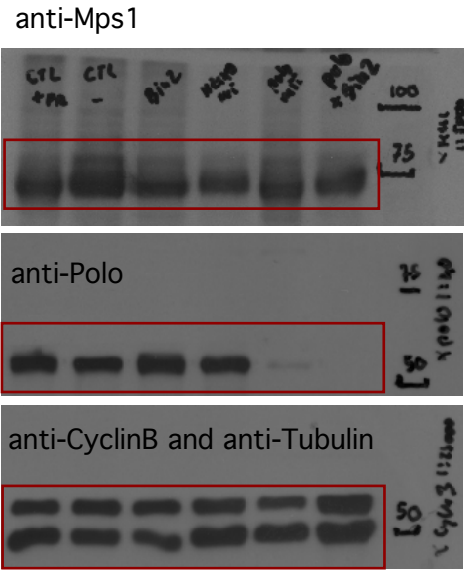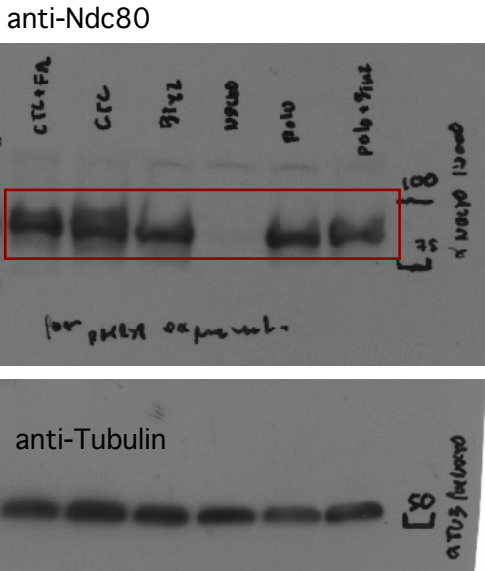

Supplement: emboj2013109df2e.pdf [file emboj2013109df2e.pdf]

# Source data Figure 3

Boxed area indicates the cropped images shown in the figure

Figure 3C

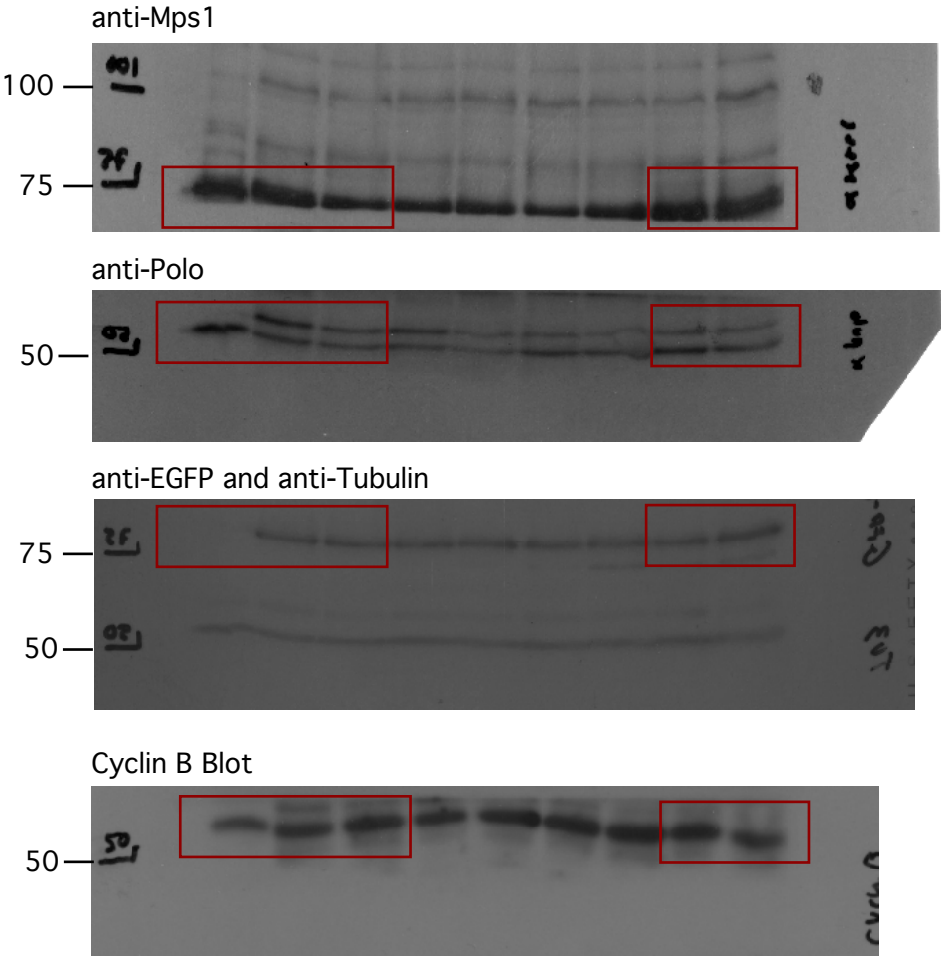

Supplement: emboj2013109df3c.pdf [file emboj2013109df3c.pdf]

# Source data Figure 7

Boxed area indicates the cropped images shown in the figure

## Figure 7C

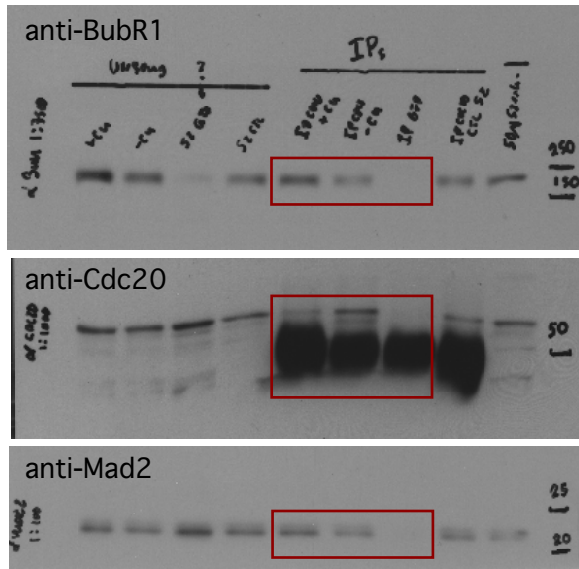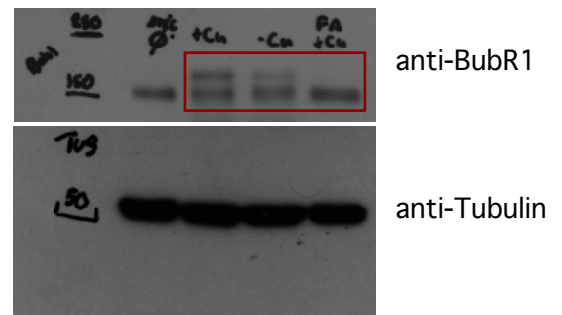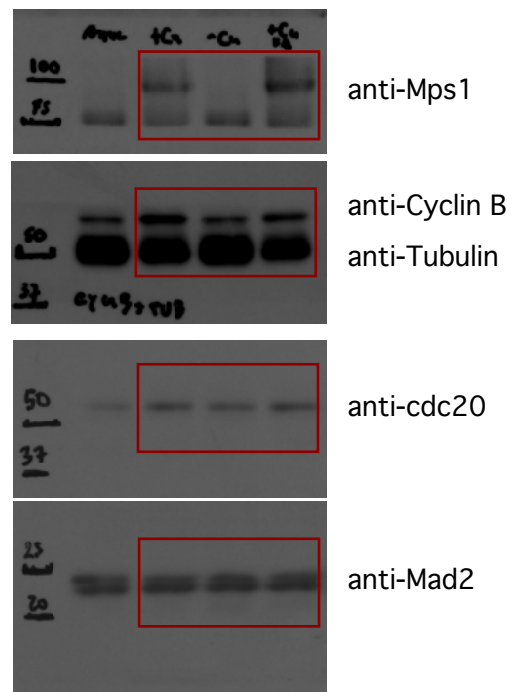

Supplement: emboj2013109df7c.pdf [file emboj2013109df7c.pdf]
